# Supplementary material for: Safety and efficacy of retrograde intrarenal surgery for urolithiasis in octogenarians
Source: Research Square preprint supplement (doi:10.21203/rs.3.rs-1633480/v1), 2022-05-13
Supplement: Supplementary file 5 [file 60d1843c1378c5f898e033ee.xlsx]

## Sheet: Table2
Table 2. Operative time, perioperative complications, and stone-free rate
	Octogenerian (n=166)	Younger (n=1041)	p value
Operative time, min (IQR)	62.0 (38.3-87.8)	61.2 (43.0-87.3)	0.22
Operative time (≥120 min), n (%)	10 (6.0)	101 (9.7)	0.38
Intraperative complications, n (%)	11 (6.6)	94 (9.0)	0.37
ClassIntra classification system
Ⅰ	10 (6.0)	81 (7.8)
Ⅱa	1 (0.6)	12 (1.2)
Ⅱb	0	1 (0.1)
Ⅲ	0	0
Complication category, n (%)
Bleeding	2 (1.2)	21 (2.0)
Ureteral injury	9 (5.4)	73 (7.0)
Postoperative complications, n (%)	34 (20.5)	117 (11.2)	0.002
Clavien-Dindo classification, n (%)
Ⅰ	1 (0.6)	12 (1.2)
Ⅱ	29 (17.5)	95 (9.4)
Ⅲ	1 (0.6)	6 (0.6)
Ⅳa	2 (1.2)	2 (0.2)
Ⅳb	1 (0.6)	0
GradeⅢ- Ⅳ, n (%)	4 (2.4)	8 (0.8)	0.062
Complication category, n (%)
Fever	30 (18.1)	98 (9.4)
Bleeding	0	9 (0.9)
Renal colic	0	2 (0.2)
Other	4 (2.4)	8 (0.8)
Stone-free, n (%)	133 (80.1)	714 (68.2)	0.014
Abbreviations as in Table 1.
