# Supplementary material for: Safety and efficacy of retrograde intrarenal surgery for urolithiasis in octogenarians
Source: Research Square preprint supplement (doi:10.21203/rs.3.rs-1633480/v1), 2022-05-13
Supplement: Supplementary file 6 [file 6fb8fff7310b14c4cff896a1.xlsx]

## Sheet: Table4
Table 4. Comparison of clinical characteristics and perioperative outcomes between octogenarians and youngers after propensity adjustment
	Octogenerian (n=71)	Younger (n=71)	p value
Clinical characteristics
Sex, n (%)			1
men	19 (26.8)	20 (28.2)
Women	52 (73.2)	51 (71.8)
ASA score, n (%)			1
≦ 2	8 (11.3)	7 (9.9)
≧ 3	63 (88.7)	64 (90.1)
Performance status, n (%)
≦ 2	47 (66.2)	50 (70.4)	0.74
≧ 3	24 (33.8)	21 (29.6)
Body mass index, n (%)			0.96
<18.5	26 (36.6)	24 (33.8)
18.5 to <25	42 (59.2)	43 (60.6)
25 to <30	2 (2.8)	3 (4.2)
≧30	1 (1.4)	1 (1.4)
eGFR, n (%)			1
<30	1 (1.4)	1 (1.4)
30 to <60	29 (40.8)	30 (42.3)
≧60	41 (57.7)	40 (56.3)
Comorbidities, n (%)			1
Cardiovascular	19 (26.8)	17 (23.9)	0.85
Diabetes mellitus	13 (18.3)	13 (18.3)	1
Stone location, n (%)
Renal pelvis/calices	20 (28.2)	20 (28.2)	0.95
Ureter	10 (14.1)	12 (16.9)
Renal pelvis/calices and ureter	41 (57.7)	39 (54.9)
Pre-stent	67 (94.4)	65 (91.5)	0.75
History of obstructive pyelonephritis	44 (62.0)	41 (57.7)	0.73
Stone size, mm (IQR)	10.2 (3.0-28.0)	11.0 (3.2-32.0)	0.94
Operative time, min (IQR)	58.0 (19.0-121.0)	58.0 (15.0-126.0)	0.96
Perioperative outcomes
Intraperative complications, n (%)	6 (8.5)	4 (5.6)	0.75
Postoperative complications, n (%)	8 (11.3)	13 (18.3)	0.24
GradeⅢ- Ⅳ, n (%)	1 (1.4)	1 (1.4)	1
Stone-free, n (%)	62 (87.3)	51 (71.8)	0.044
Abbreviations as in Table 1.
