# Supplementary material for: Safety and efficacy of retrograde intrarenal surgery for urolithiasis in octogenarians
Source: Research Square preprint supplement (doi:10.21203/rs.3.rs-1633480/v1), 2022-05-13
Supplement: Supplementary file 7 [file 7e0a7a99b9e0de4194e5ae3c.xlsx]

## Sheet: Table3
Table 3. Multivariate analysis for predictive factors of postoperative complications
	complication
	Odds ratio (95% confidence interval)	p value
Sex (female vs. male)	2.08 (1.41-3.06)	<0.001
ASA. score (3 vs. 1.2)	1.88 (1.06-3.57)	0.045
Performance status (≧3 vs. ≦2)	1.62 (0.83-3.14)	0.16
Body mass index	0.98 (0.93-1.03)	0.66
Side (right vs. left)	1.15 (0.85-1.66)	0.63
eGFR	0.99 (0.99-1.01)	0.46
Diabetes mellitus	1.69 (1.05-2.45)	0.029
Cerebrovascular	1.03 (0.43-1.45)	0.89
ESWL before RIRS	0.78 (0.39-1.56)	0.48
History of obstructive pyelonephritis	1.42 (0.91-2.20)	0.12
Pre-stent	1.33 (0.62-2.86)	0.46
Stone size	0.97 (0.95-1.02)	0.25
Operative time (≥120 min)	1.77 (1.02-3.12)	0.043
Age (octogenarians vs. youngers)	1.02 (0.60-1.75)	0.92
Abbreviations as in Table 1.
