# Supplementary material for: Safety and efficacy of retrograde intrarenal surgery for urolithiasis in octogenarians
Source: Research Square preprint supplement (doi:10.21203/rs.3.rs-1633480/v1), 2022-05-13
Supplement: Supplementary file 8 [file e91689ceb87d7a73e9471e69.xlsx]

## Sheet: Table1
Table 1. Clinical characteristics of patients and perioperative data
	Octogenerian (n=166)	Younger (n=1041)	p value
Age (IQR)	85 (82-88)	60 (50-69)
Sex, n (%)
Male	59 (35.5)	651 (62.5)	<0.001
Female	107 (64.5)	390 (37.5)
Body mass index (IQR)	20.9 (17.4-22.6)	23.1 (20.8-25.8)	<0.001
Performance status, n (%)
0	13 (7.8)	791 (76.0)	<0.001
1	43 (25.9)	149 (14.3)
2	16 (9.6)	26 (2.5)
3	25 (15.1)	18 (1.7)
4	69 (41.6)	57 (5.5)
ASA score, n (%)			<0.001
1	5 (3.0)	307 (29.5)
2	125 (75.3)	693 (66.6)
3	36 (21.7)	41 (3.9)
Comorbidities, n (%)
Cardiovascular	53 (31.9)	304 (29.2)	0.48
Respiratory	7 (4.2)	44 (4.2)	0.99
Cerebrovascular	82 (49.4)	119 (11.4)	<0.001
Diabetes mellitus	40 (24.1)	153 (14.7)	0.003
eGFR (IQR)	57.2 (44.1-74.0)	65.6 (53.4-77.9)	0.002
Surgical side, n (%)
Right	98 (59.0)	475 (45.6)	0.002
Left	68 (41.0)	566 (54.4)
Stone location, n (%)
Renal pelvis/calices	52 (31.3)	324 (31.1)	0.97
Ureter	35 (21.1)	229 (22.0)
Renal pelvis/calices and ureter	79 (47.6)	488 (46.9)
Upper calyx	18 (10.8)	123 (11.8)
Mild calyx	25 (15.1)	171 (16.4)
Lower calyx	33 (20.0)	407 (39.1)
Renal pelvis	41 (24.7)	140 (13.4)
Proximal ureter	77 (46.4)	421 (40.4)
Mild ureter	10 (6.0)	126 (12.1)
Distal ureter	27 (16.3)	174 (16.7)
Stone size, mm (IQR)	10.0 (7.1-16.0)	11.5 (8.3-15.8)	0.11
History of obstructive pyelonephritis, n (%)	108 (65.1)	219 (21.0)	<0.001
Bacteriuria, n (%)	28 (16.9)	415 (39.9)	<0.001
Pre-operative drainage, n (%)
Stent	149 (89.8)	914 (87.8)	0.49
Nephrostomy	2 (1.2)	6 (0.6)
Stent + nephrostomy	4 (2.4)	21 (2.0)
ESWL before RIRS	2 (1.2)	118 (11.3)	<0.001
ASA, American Society of Anesthesiologists; eGFR, estimated glomerular filtration rate; ESWL, extracorporeal shock wave lithotripsy; RIRS, retrograde intrarenal surgery; IQR, interquartile range
